# Supplementary material for: Dietary-challenged mice with Alzheimer-like pathology show increased energy expenditure and reduced adipocyte hypertrophy and steatosis
Source: publisher site journal article supplement (doi:10.18632/aging.202978), 2021-04-16
Supplement: Supplementary file [file aging-v13i8-202978-supplementary-material-SD2.pdf]

## SUPPLEMENTARY TABLES

**Supplementary Table 1. Detailed ingredients of NCD, HSD, and HFD.**

|                       | <b>NCD</b> | <b>HSD</b> | <b>HFD</b> |
|-----------------------|------------|------------|------------|
| Product No.           | D16022602  | D16022604  | D12492     |
| <b>Ingredient (g)</b> |            |            |            |
| Casein                | 160.5      | 160.5      | 200        |
| DL-Methionine         | 3.0        | 3.0        | 0          |
| L-Cystine             | 0          | 0          | 3.0        |
| Corn starch           | 442.5      | 0          | 0          |
| Maltodextrin 10       | 125.0      | 25.0       | 125.0      |
| Sucrose               | 0          | 542.5      | 68.8       |
| Cellulose, BW200      | 50.0       | 50.0       | 50.0       |
| Corn oil              | 98.4       | 98.4       | 0          |
| Soybean oil           | 0          | 0          | 25.0       |
| Lard                  | 0          | 0          | 245.0      |
| t-Butylhydroquinone   | 0.02       | 0.02       | 0          |
| Mineral mix S10022M   | 35.0       | 35.0       | 0          |
| Mineral mix S10026    | 0          | 0          | 10.0       |
| Vitamin mix V10037    | 10.0       | 10.0       | 0          |
| Vitamin mix V10001    | 0          | 0          | 10.0       |
| Choline bitartate     | 2.5        | 2.5        | 2.0        |
| Dicalcium phosphate   | 0          | 0          | 13.0       |
| Calcium carbonate     | 0          | 0          | 5.5        |
| Potassium citrate     | 0          | 0          | 16.5       |

Abbreviations: NCD: normal-control diet; HSD: high-sucrose diet; HFD: high-fat diet.

**Supplementary Table 2. Corresponding p-values to significant comparisons shown in Figure 5.**

| <b>Parameter</b> | <b>Time-point</b> | <b>Comparison<br/>(A vs. B)</b> | <b>Difference<br/>(B in relation to A)</b> | <b>P</b> |
|------------------|-------------------|---------------------------------|--------------------------------------------|----------|
| AUC              | Week 12           | NCD WT vs. HFD WT               | + 83%                                      | <0.001   |
|                  |                   | NCD APP23 vs. HFD APP23         | + 56%                                      | <0.001   |
|                  |                   | HSD WT vs. HFD WT               | + 59%                                      | <0.001   |
|                  |                   | HSD APP23 vs. HFD APP23         | + 76%                                      | 0.009    |
|                  |                   | HFD WT vs. HFD APP23            | - 20%                                      | 0.017    |
|                  | Week 20           | NCD WT vs. HFD WT               | + 104%                                     | <0.001   |
|                  |                   | NCD APP23 vs. HFD APP23         | + 85%                                      | <0.001   |
|                  |                   | HSD WT vs. HFD WT               | + 63%                                      | <0.001   |
|                  |                   | HSD APP23 vs. HFD APP23         | + 51%                                      | <0.001   |
|                  |                   | HFD WT vs. HFD APP23            | - 15%                                      | 0.049    |
| Fasting glucose  | Week 12           | NCD APP23 vs. HSD APP23         | + 25%                                      | <0.001   |
|                  |                   | NCD WT vs. HFD WT               | + 26%                                      | 0.004    |
|                  |                   | NCD APP23 vs. HFD APP23         | + 30%                                      | 0.011    |
|                  |                   | HSD WT vs. HFD WT               | + 21%                                      | 0.014    |
|                  | Week 20           | NCD APP23 vs. HSD APP23         | + 18%                                      | 0.027    |
|                  |                   | NCD WT vs. HFD WT               | + 21%                                      | 0.002    |
|                  |                   | HSD WT vs. HFD WT               | + 19%                                      | 0.004    |
|                  |                   | NCD APP23 vs. HFD APP23         | + 35%                                      | 0.003    |
| Fasting insulin  | Week 12           | NCD WT vs. HFD WT               | + 231%                                     | 0.001    |
|                  |                   | NCD APP23 vs. HFD APP23         | + 305%                                     | 0.009    |
|                  |                   | HSD WT vs. HFD WT               | + 231%                                     | 0.003    |
|                  |                   | HSD APP23 vs. HFD APP23         | + 174%                                     | 0.039    |
|                  | Week 20           | NCD WT vs. HFD WT               | + 522%                                     | <0.001   |
|                  |                   | NCD APP23 vs. HFD APP23         | + 267%                                     | <0.001   |
|                  |                   | HSD WT vs. HFD WT               | + 479%                                     | <0.001   |
|                  |                   | HSD APP23 vs. HFD APP23         | + 288%                                     | <0.001   |

Statistical tests are described in the respective figure legend. Differences are displayed as percentage in relation to the first group of the comparison (e.g. NCD WT vs HFD WT +83% means that HFD WT shows 83% more than NCD WT). Abbreviations: AUC: area under the curve.

**Supplementary Table 3. Corresponding p-values to significant comparisons shown in Figure 6.**

| <b>Parameter</b>           | <b>Time-point</b>       | <b>Comparison<br/>(A vs. B)</b> | <b>Difference<br/>(B in relation to A)</b> | <b>P</b> |
|----------------------------|-------------------------|---------------------------------|--------------------------------------------|----------|
| O <sub>2</sub> consumption | Baseline                | WT vs. APP23                    | + 12%                                      | <0.001   |
|                            | Week 12                 | NCD WT vs. NCD APP23            | + 22%                                      | 0.030    |
|                            |                         | HSD WT vs. HSD APP23            | + 15%                                      | 0.013    |
|                            |                         | HFD WT vs. HFD APP23            | + 16%                                      | 0.002    |
|                            | Week 20                 | NCD WT vs. NCD APP23            | + 22%                                      | 0.013    |
|                            |                         | HSD WT vs. HSD APP23            | + 14%                                      | 0.057    |
| HFD WT vs. HFD APP23       |                         | + 10%                           | <0.001                                     |          |
| CO <sub>2</sub> production | Baseline                | WT vs. APP23                    | + 11%                                      | <0.001   |
|                            | Week 12                 | NCD WT vs. NCD APP23            | + 14%                                      | <0.001   |
|                            |                         | HFD WT vs. HFD APP23            | + 14%                                      | 0.003    |
|                            |                         | NCD WT vs. HFD WT               | - 10%                                      | 0.051    |
|                            |                         | NCD APP23 vs. HFD APP23         | - 10%                                      | 0.003    |
|                            |                         | HSD WT vs. HFD WT               | - 15%                                      | <0.001   |
|                            |                         | HSD APP23 vs. HFD APP23         | - 9%                                       | <0.001   |
|                            | Week 20                 | NCD WT vs. NCD APP23            | + 16%                                      | 0.018    |
|                            |                         | HFD WT vs. HFD APP23            | + 13%                                      | <0.001   |
|                            |                         | NCD WT vs. HFD WT               | - 18%                                      | <0.001   |
|                            |                         | NCD APP23 vs. HFD APP23         | - 20%                                      | <0.001   |
|                            |                         | HSD WT vs. HFD WT               | - 22%                                      | <0.001   |
|                            |                         | HSD APP23 vs. HFD APP23         | - 15%                                      | <0.001   |
|                            |                         | Week 12                         | HSD WT vs. HSD APP23                       | - 9%     |
| NCD WT vs. HFD WT          |                         |                                 | - 16%                                      | <0.001   |
| NCD APP23 vs. HFD APP23    | - 11%                   |                                 | 0.009                                      |          |
| HSD WT vs. HFD WT          | - 16%                   |                                 | <0.001                                     |          |
| HSD APP23 vs. HFD APP23    | - 9%                    |                                 | 0.003                                      |          |
| HSD WT vs. HSD APP23       | - 10%                   |                                 | 0.020                                      |          |
| Week 20                    | NCD WT vs. HSD WT       | + 7%                            | 0.049                                      |          |
|                            | NCD WT vs. HFD WT       | - 16%                           | <0.001                                     |          |
|                            | NCD APP23 vs. HFD APP23 | - 14%                           | <0.001                                     |          |
|                            | HSD WT vs. HFD WT       | - 22%                           | <0.001                                     |          |
|                            | HSD APP23 vs. HFD APP23 | - 14%                           | <0.001                                     |          |
|                            | Activity                | Baseline                        | WT vs. APP23                               | + 38%    |
| Week 12                    |                         | NCD WT vs. NCD APP23            | + 84%                                      | 0.016    |
|                            |                         | HFD WT vs. HFD APP23            | + 57%                                      | 0.061    |
|                            |                         | NCD APP23 vs. HFD APP23         | - 46%                                      | 0.016    |
|                            |                         | HSD WT vs. HFD WT               | - 46%                                      | 0.004    |
| Week 20                    |                         | NCD WT vs. NCD APP23            | + 50%                                      | 0.010    |
|                            |                         | HFD WT vs. HFD APP23            | + 71%                                      | 0.007    |
|                            |                         | NCD APP23 vs. HFD APP23         | - 44%                                      | 0.001    |
|                            |                         | NCD WT vs. HFD WT               | - 50%                                      | <0.001   |
|                            |                         | HSD WT vs. HFD WT               | - 60%                                      | 0.007    |
|                            | HSD APP23 vs. HFD APP23 | - 40%                           | 0.002                                      |          |

Statistical tests are described in the respective Figure legend. Differences are displayed as percentage in relation to the first group of the comparison (e.g. NCD WT vs HFD WT +83% means that HFD WT shows 83% more than NCD WT).

**Supplementary Table 4. Results of spearman correlation of energy expenditure with lean mass, corresponding to Figure 6J–6L and Supplementary Figure 1J–1L, and to Supplementary Figure 2G–2I, 2P–2R.**

| <b>Figure</b>              | <b>Time-point</b> | <b>r<sub>WT</sub></b> | <b>p<sub>WT</sub></b> | <b>r<sub>APP23</sub></b> | <b>p<sub>APP23</sub></b> |
|----------------------------|-------------------|-----------------------|-----------------------|--------------------------|--------------------------|
| Figure 6J-L                | Baseline          | 0.348                 | 0.041                 | 0.607                    | 0.001                    |
|                            | Week 12           | 0.662                 | <0.001                | 0.673                    | <0.001                   |
|                            | Week 20           | 0.615                 | <0.001                | 0.550                    | 0.003                    |
| Supplementary Figure 1J–1L | Baseline          | 0.511                 | 0.002                 | 0.696                    | <0.001                   |
|                            | Week 12           | 0.662                 | <0.001                | 0.769                    | <0.001                   |
|                            | Week 20           | 0.734                 | <0.001                | 0.816                    | <0.001                   |
| Supplementary Figure 2G–2I | Baseline          | 0.179                 | 0.305                 | 0.642                    | <0.001                   |
|                            | Week 12           | 0.503                 | 0.002                 | 0.653                    | <0.001                   |
|                            | Week 20           | 0.488                 | 0.003                 | 0.489                    | 0,004                    |
| Supplementary Figure 2P–2R | Baseline          | 0.417                 | 0.013                 | 0.629                    | <0.001                   |
|                            | Week 12           | 0.624                 | <0.001                | 0.793                    | <0.001                   |
|                            | Week 20           | 0.638                 | <0.001                | 0.826                    | <0.001                   |
